# Supplementary material
Source: PubMed Central journal article supplement (PMC6855109)
Supplement: baADV2019000286-suppl1.pdf [file baADV2019000286-suppl1.pdf]

## Supplementary Information

Blockade of TIM-1 on the donor graft ameliorates graft-versus-host disease following hematopoietic cell transplantation

Bettina P. Iliopoulou<sup>1</sup>, Katie Hsu<sup>1</sup>, Magdiel Pérez-Cruz<sup>1</sup>, Sai-Wen Tang<sup>1</sup>, Wendy W. Pang<sup>1</sup>, Tom Erkers<sup>1</sup>, Neeraja Kambham\*, Gordon J. Freeman<sup>2</sup>, Rosemarie H. Dekruyff<sup>§</sup>, Everett H. Meyer<sup>1</sup>

## Contents

|                                     |            |
|-------------------------------------|------------|
| Supplementary Materials and Methods | Page 2-5   |
| Table S1                            | Page 6-7   |
| Table S2                            | Page 8     |
| Figure S1                           | Page 9     |
| Figure S2                           | Page 10    |
| Figure S3                           | Page 11    |
| Figure S4                           | Page 12    |
| Figure S5                           | Page 13-14 |
| Figure S6                           | Page 15    |
| Figure S7                           | Page 16-17 |
| Figure S8                           | Page 18-19 |
| Figure S9                           | Page 20    |
| Figure S10                          | Page 21-22 |

## Supplementary Materials and Methods

### Allogeneic bone marrow transplantation

BALB/c recipient mice received lethal total body irradiation (TBI; 200kV x-ray source; Kimtron) consisting of two doses of 4.0 Gy 4 hours apart.  $5.0 \times 10^6$  TCD-BM cells from either B6 WT or B6 TIM-1<sup>-/-</sup> mice were injected via tail vein together with  $1.0 \times 10^6$  B6 WT or B6 TIM-1<sup>-/-</sup> Tcon, depending on the transplant system. In some experiments, mice were treated with PtdSer (40µg/mouse) i.p. (P7769, Sigma), on the same day as HCT.

In the transplant models, when we looked for the role of *i*NKT cells, 25,000 B6 WT, TIM-1<sup>-/-</sup>CD4<sup>+</sup> *i*NKT or WT B6 *i*NKT cells pre-activated with anti-TIM-1 mAb (3B3) were also co-injected on day 0. For the A20 and BCL<sub>1</sub> tumor models, tumor cells were injected via tail vein on day 0 together with TCD-BM. For the GVHD score weight, fur, skin, activity and posture were evaluated and a score from 0 to 2 was assigned to each characteristic. Histopathology of gut, liver and skin tissue, as well as serum collection for cytokine analysis was performed on day +9 post HCT.

### CD4<sup>+</sup> *i*NKT cells isolation and *in vitro* preactivation with 3B3 anti-TIM-1 mAb

CD4<sup>+</sup> *i*NKT cells were isolated as previously described <sup>22</sup>. Briefly, splenocytes from WT and TIM-1<sup>-/-</sup> knockout mice underwent B cells depletion using CD45R (B220) MicroBeads (Miltenyi Biotec). They were later on stained with PBS-57-CD1d tetramer PE and enriched with anti-PE Microbeads (Miltenyi Biotec).

For the *in vitro* preactivation with the anti-TIM-1 mAb (3B3) experiment, *i*NKT cells were further sorted to purity on a FACSaria II cell sorter based on TCRβ<sup>+</sup>, CD4<sup>+</sup> and PBS-57 CD1d staining were incubated with the anti-TIM-1 or isotype control mAb (10ug/ml) at 37°C for 60min.

### Mouse *in vitro* cell stimulation assays

For analysis of cell proliferation, murine WT B6 Tcons were resuspended in PBS and stained with CellTrace Violet cell proliferation kit (Life Technologies) for 5 minutes

at 37°C. Immediately after staining, cells were washed 3 times in ice-cold RPMI 1640 (Mediatech) plus 10% FCS and finally resuspended in PBS. CellTrace Violet labeled Tcons (responders) were cultured with BALB/c irradiated (30 Gy) splenocytes (stimulators) at a ratio of 1:2 in the presence or absence of anti-TIM-1 mAb (3D10). In separate conditions, CellTrace Violet labeled WT or TIM-1<sup>-/-</sup> knockout B6 Tcons were stimulated with anti-CD3/CD28 dynabeads (ThermoFisher) at 1:2 ratio. Similarly, WT *i*NKT cells were stained with CellTrace Violet and cultured with dendritic cells and  $\alpha$ -galactosylceramide (AdipoGen) or with anti-CD3/CD28 dynabeads at 1:2 ratio. Data were collected using a BD LSR2 flow cytometer (BD Biosciences) and data were analyzed using FlowJo 10.0.7 software (Tree, Star, Ashland, OR). WT and TIM-1<sup>-/-</sup> *i*NKT cells were sorted to purity and activated with anti-CD3/CD28 dynabeads at 1:1 ratio for 72 hours. Culture supernatant was collected and analyzed by multiplex assay (Luminex).

### **Human *in vitro* cell stimulation assays**

Monocyte-derived immature dendritic cells were generated from peripheral blood mononuclear cells (PBMCs, Stanford Blood Center) using CD14<sup>+</sup> MACS microbead enrichment (Miltenyi biotec, Auburn, CA). The CD14<sup>+</sup> cells were cultured in 37 °C and 5% CO<sub>2</sub> for 7 days in Roswell Park Memorial Institute (RPMI) medium (ThermoFisher Scientific, Waltham, MA) supplemented with 250 IU/mL interleukin (IL)-4, 800 IU/mL granulocyte-macrophage colony-stimulating factor (GM-CSF) (R&D Systems, Minneapolis, MN), L-glutamine, 100 U/ml penicillin, 100 µg/ml streptomycin (HyClone; GE Healthcare Life Sciences, South Logan, UT), and 5 % human AB serum (ThermoFisher). The DCs were irradiated (30 Gy) and were co-cultured with allogeneic responder PBMCs for 7 days at a ratio of 1:5. In separate conditions, responder PBMC were stimulated with anti-CD3/CD28 dynabeads (ThermoFisher) at a 1:1 ratio. The responder PBMCs were labelled with CellTrace Violet (ThermoFisher). Data were collected using a BD LSR2 flow cytometer (BD

Biosciences) and data were analyzed using FlowJo 10.0.7 software (Tree, Star, Ashland, OR)

### **Flow cytometry**

For flow cytometry we purchased from Southern Biotech (Birmingham, AL), BD Biosciences (San Jose, CA), eBioscience (San Diego, CA), R&D Systems, (Minneapolis, MN), and Biolegend (San Diego, CA) the following anti-mouse antibodies: CD4 (GK1.5), CD8 (53-6.7), CD25 (PC61), FoxP3 (FJK-16s), PDCA-1 (927), H-2Kb (AF6-88.5), H-2Dd (34-2-12), CD19 (6D5). PBS-57-CD1d tetramer phycoerythrin (PE; National Institutes of Health). Anti-idiotypic BCL<sub>1</sub> antibody was purified from a hybridoma secreting rat IgG2a (Dutt S. et al, Blood, 2011). The antibody was conjugated with Alexa Fluor 488 for fluorescence-activated cell sorting (FACS). We used the Fixable Viability Dye eFluor® 506 (eBioscience) for dead cell staining. Analysis was performed on a LSR II (Becton-Dickinson, San Jose, CA). The following anti-human antibodies were used: APC/Fire 750-conjugated anti-human CD3 (UCHT1), PerCP/Cy5.5-conjugated anti-human CD8a (RPA-T8), Alexa Fluor 700-conjugated anti-human CD4 (RPA-T4, Brilliant Violet 605-conjugated anti-human CD3 (UCHT1), PE-conjugated anti-human programmed death-1 (PD-1, EH12.2H7), APC-conjugated anti-human CD25 (M-A251), PE-CF594-conjugated anti-human CCR7 (150503), PE-Cy7-conjugated anti-human CD45RA (HI100), Aqua amine (All from Biolegend, San Diego, CA). Fixable viability dye eFluor 506 (eBioscience) was used for identification and removal of dead cells.

### **Quantitative Real-time reverse transcription-PCR (qRT-PCR)**

Gut tissue was collected into a RNA stabilization buffer and was cut into small pieces and homogenized before loaded onto a QIAshredder spin column (Qiagen). RNA from gut was extracted using the RNeasy Mini kit according to manufacturer's instructions (Qiagen). The qRT-PCR was performed using iTaq™ Universal SYBR Green One-Step Kit (Bio-Rad) on a 7900HT Fast Real Time PCR system (Applied Biosystems) using the following cycling parameters (95°C for 2min, followed by 40

cycles for 95 °C for 15s and 60 °C for 1min). A dissociation procedure was performed to generate a melting curve for confirmation of amplification specificity. GAPDH were used as the reference gene and the relative levels of gene expression were calculated by the  $2^{\Delta\Delta Ct}$  Method.

### **Microarrays**

Total RNA was extracted, using an RNeasy Micro Kit (Qiagen) and its quality was assessed by and Agilent 2100 Bioanalyzer. Total RNA (from 500pg-2ng) was reverse transcribed into cDNA followed by in vitro transcription use GeneChip™ WT Pico (Affymetrix, Santa Clara, CA). Labeled cRNAs were hybridized to (Affymetrix) according to the manufacturer's protocol, and the chips were scanned using a GeneChip Scanner 3000 GeneChip™ Mouse Gene 2.0ST- this is a whole transcript design with probes at 3' as well as exon. Catalog number: 902118 (Affymetrix). Background correction, normalization and estimation of gene expression was performed using the Robust Multiarray Average (RMA) method in R/Bioconductor ([www.bioconductor.org](http://www.bioconductor.org)). Following aggregation, the samples were re-normalized using quantile normalization.

### **Statistical analysis**

Differences in animal survival (Kaplan–Meier survival curves) were analyzed with the log-rank test. Weight variation and GVHD score were analyzed with a two-way ANOVA test, using Graphpad Prism. For the human MRL data a paired t-test between treated and untreated PBMCs was performed. All other comparisons were performed with the two-tailed Student *t* test, and  $p < 0.05$  was considered statistically significant.

**Table S1**

| Gene          | Description                                 | Fold change |
|---------------|---------------------------------------------|-------------|
| <i>Ccne1</i>  | Cyclin E1                                   | 1           |
| <i>E2f1</i>   | E2F transcription factor 1                  | 1           |
| <i>Cdc6</i>   | Cell division cycle 6                       | 1.24        |
| <i>Pcna</i>   | Proliferating cell nuclear antigen          | 1           |
| <i>Rfc4</i>   | Replication factor (activator 1) 4          | 1           |
| <i>Dhft</i>   | Dihydrofolate reductase                     | -1.91       |
| <i>Rrm2d</i>  | Ribonucleotide reductase M2                 | 1.05        |
| <i>Rad51</i>  | RAD51 homolog                               | 1           |
| <i>Top2a</i>  | Topoisomerase (DNA) II alpha                | 1.18        |
| <i>Ccna2</i>  | Cyclin A2                                   | 1.02        |
| <i>Ccnf</i>   | Cyclin F                                    | 1           |
| <i>Ccnb1</i>  | Cyclin B1                                   | 1           |
| <i>Plk4</i>   | Polo-like kinase 4                          | 1           |
| <i>Pttg1</i>  | Pituitary tumor-transforming gene 1         | 1           |
| <i>Rad21</i>  | RAD21 homolog                               | -1.05       |
| <i>Ccng2</i>  | Cyclin G2                                   | 1           |
| <i>Cdkn3</i>  | Cyclin-dependent kinase inhibitor 3         | 1           |
| <i>Ctla-4</i> | Cytotoxic T-lymphocyte-associated protein 4 | 1           |
| <i>Cd69</i>   | CD69 antigen                                | -1.04       |
| <i>Il2</i>    | Interleukin 2                               | 1           |
| <i>Pdcd1</i>  | Programmed cell death 1                     | -1.21       |
| <i>Sell</i>   | Selectin lymphocyte (CD62L)                 | 1           |
| <i>Iag3</i>   | Lymphocyte activation gene 3                | -1.63       |

**Table S1**

**No difference is observed in the expression of genes associated with cell cycle and activation.**

List of genes associated with cell cycle and T cell activation as well as fold difference observed between anti-TIM1 (3D10) and isotype treated groups. RNA was isolated from whole gut.

## Table S2

| Inflammation of intestine                                                                                                                                                                                                                                                                                                     | p-value  | Activation z-score | # molecules |
|-------------------------------------------------------------------------------------------------------------------------------------------------------------------------------------------------------------------------------------------------------------------------------------------------------------------------------|----------|--------------------|-------------|
| <b>AGR2, ALOX15, ANXA1, APOA4, ATG16L1, C3, CCL11, CCL25, CCR9, CD274, CD44, CEACAM1, CFH, CKB, CKMT1A/CKMT1B, EDN1, ERN2, FAAH, GCNT3, IL18, LTBR, LY96, MEP1A, MERTK, mir-103, MME, MMP7, MUC2, NR1H4, NR1I2, NR5A2, PLS1, POR, PPARG, Retnla, RETNLB, RIPK2, SLC22A4, SLPI, TLR1, TLR2, TLR4, TNFRSF1B, TP53INP1, VNN1</b> | 1.39E-05 | -0.930             | 45          |

**Table S2**

**Inflammation of the intestine was downregulated in the anti-TIM-1 antagonistic mAb (3D10) treated group.**

List of genes associated with inflammation of the intestine based on Ingenuity Pathway Analysis. Genes shown in black are upregulated in the anti-TIM-1 (3D10) treated group as opposed to the isotype control. Genes shown in grey are downregulated in the anti-TIM-1 (3D10) treated group as opposed to the isotype control.



# Figure S1

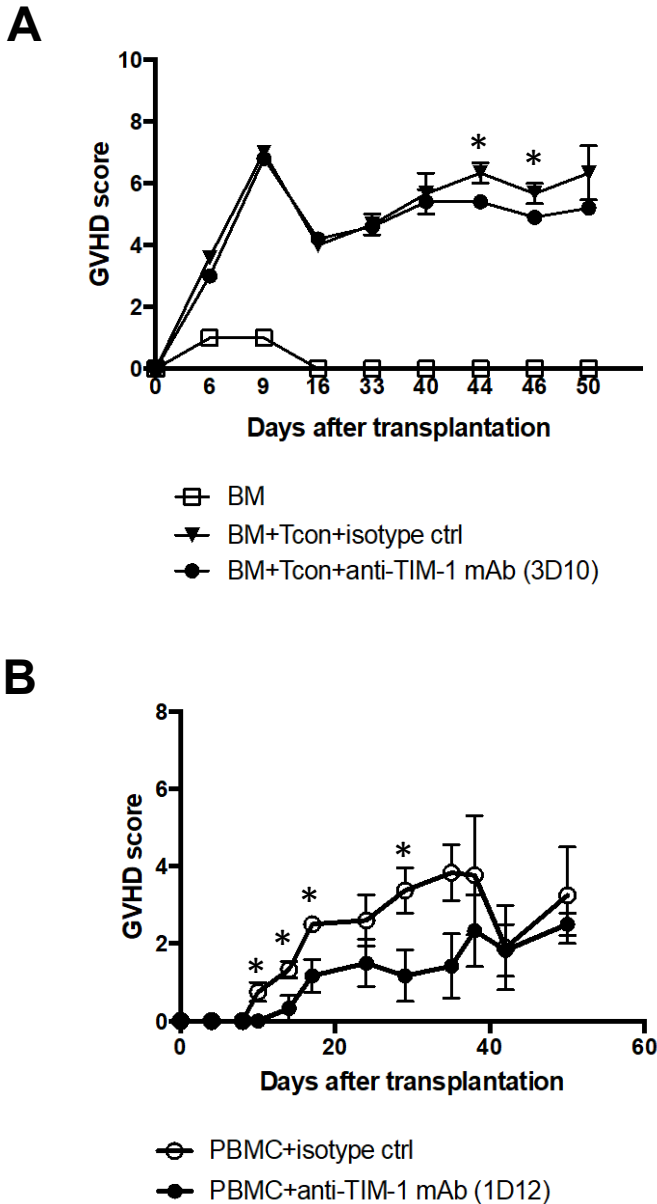

**Figure S1. Anti-TIM-1 treated mice present reduced GVHD score.**

**(A)** GVHD score of allogeneic transplanted BALB/c recipient mice treated with either B6 Tcon (▼), or Tcon and anti-TIM-1 mAb (●). Control mice that received TCD-BM only are shown (□). (●). Pooled data from two independent experiment (n=10/group) are shown.

**(B)** GVHD score of non-obese diabetic (NOD)-severe combined immunodeficient (*scid*) *IL2ry<sup>null</sup>* mice transplanted with only Hu-peripheral blood mononuclear cells (PBMCs) (○), or PBMCs and anti-human TIM-1 mAb (1D12) (●). For GVHD score pooled data of two independent experiments are shown (n=8 mice/group) with statistical significance between groups. For GVHD the two-tailed Student's t test was used. Error bars indicate SEM. \* $p \leq 0.05$

## Figure S2

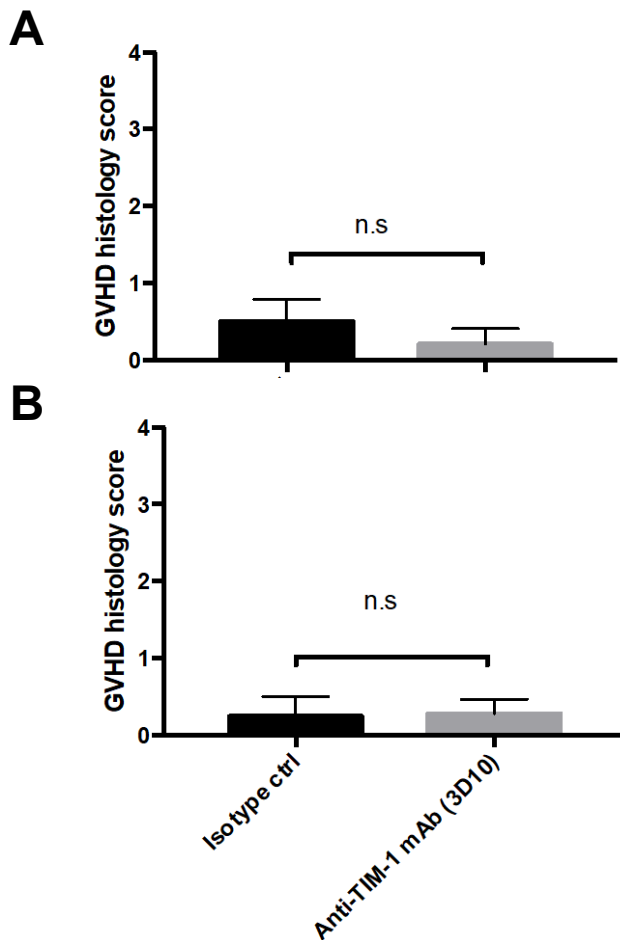

**Figure S2. No differences in live or skin histopathology were observed in mice treated with anti-TIM-1 mAb (3D10).** GVHD histology score as assessed by a histopathologist in a blinded fashion (n=10/group). **(A)** Liver was assessed for bile duct injury (manifest by nuclear hyperchromasia, nuclear crowding, infiltrating lymphocytes, and cytoplasmic vacuolation) and inflammation (infiltration with lymphocytes, neutrophils, and eosinophils). Disease was scored between 0 and 4 based on the number of involved tracts and the severity of disease in each tract (0, none; 1, few involved tracts with mild involvement; 2, numerous involved tracts but with only mild disease; 3, injury in the majority of tracts; 4, severe involvement of most tracts).

**(B)** Skin sections were scored on the basis of the following criteria: epidermis (0, normal; 1, foci of interface damage in <20% of section with occasional necrotic keratinocytes; 2, widespread interface damage in >20% of section); dermis (0, normal; 1, slightly altered with mild increased collagen density; 2, marked increased collagen density); inflammation (0, none; 1, focal infiltrates; 2, widespread infiltrates); s.c. fat (0, normal; 1, reduced number of normal adipocytes; 2, serous fat atrophy); and follicles (0, normal number of hair follicles, ~5 per linear millimeter; 1, between 1 and 5 follicles per linear millimeter; 2, <1 follicle per linear millimeter)

# Figure S3

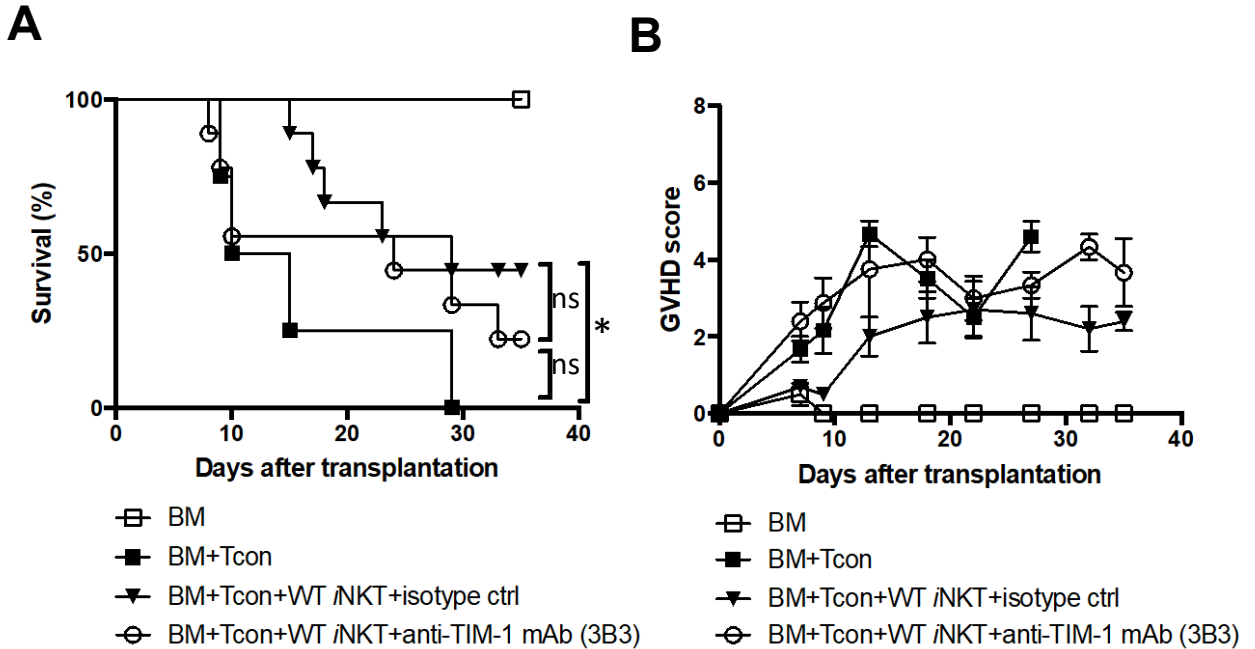

**Figure S3. (A)** Overall survival and **(B)** GVHD score of BALB/c recipient mice after injection of B6 Tcon alone (■), B6 Tcon and B6 *i*NKT cells (25,000/mouse) incubated with isotype control mAb (▼), B6 Tcon and B6 *i*NKT cells incubated with anti-TIM-1 agonist mAb (3B3)(○). GVHD scores for control mice that received only TCD-BM are shown (□). Pooled data of two independent experiments are shown (n=9 mice/group). The log-rank test was used for statistical evaluation of mouse survival (Kaplan-Meier survival curves). For GVHD the two-tailed Student's t test was used. Error bars indicate SEM. ns= not significant \* $p \leq 0.05$ .

## Figure S4

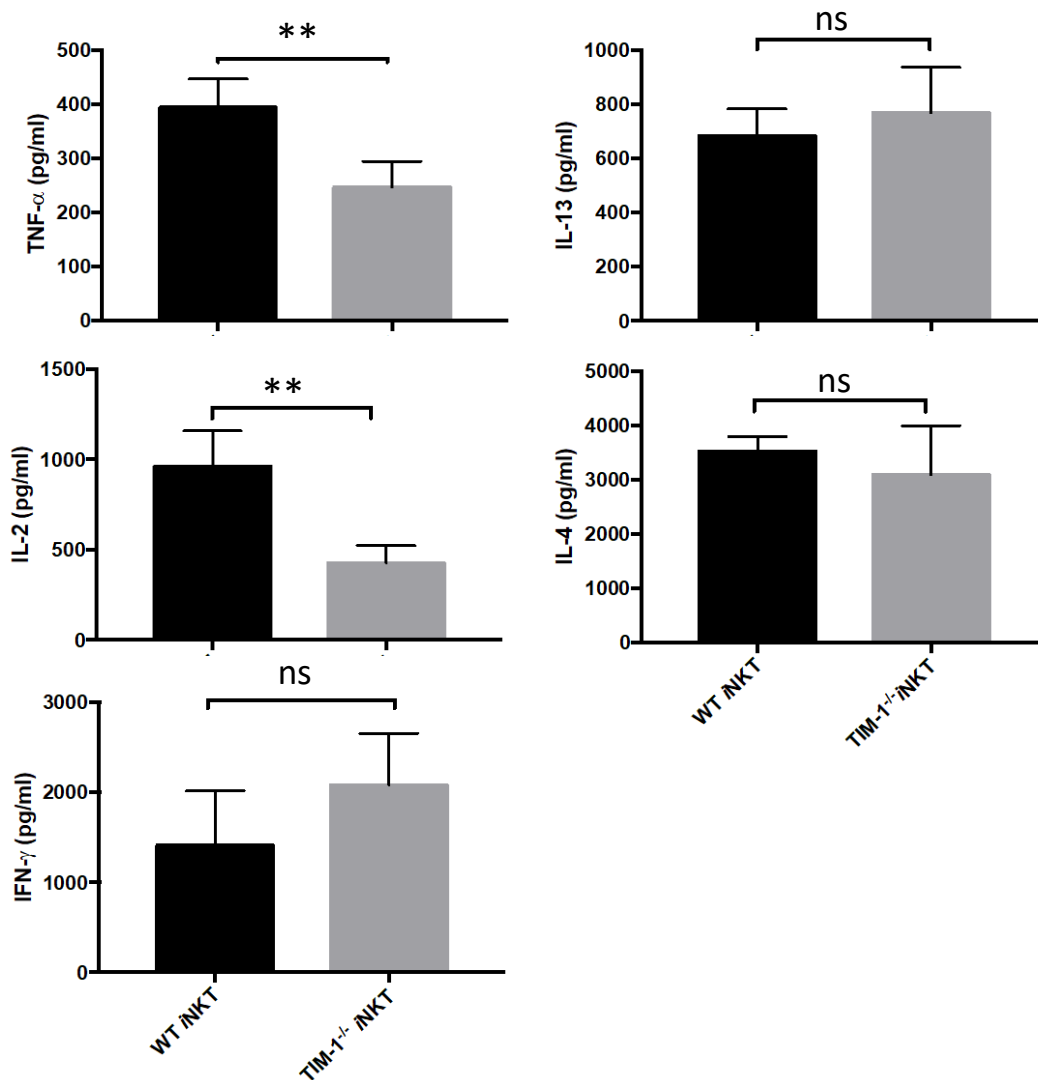

**Figure S4. Reduced levels of proinflammatory cytokines TNF- $\alpha$ , and IL-2 were detected in the supernatant of the TIM-1<sup>-/-</sup> knockout iNKT cells compared to WT iNKT.** Cytokine levels in the supernatant of sorted WT and TIM-1<sup>-/-</sup> iNKT cells that were stimulated *ex vivo* with anti-CD3/CD28 dynabeads beads (1:1 ratio) for 72hrs, as assessed by Luminex. Error bars indicate SEM. Pooled data from 2 independent experiments. For statistical analysis the two-tailed Student's t test was used. \*\* $p \leq 0.01$

Figure S5

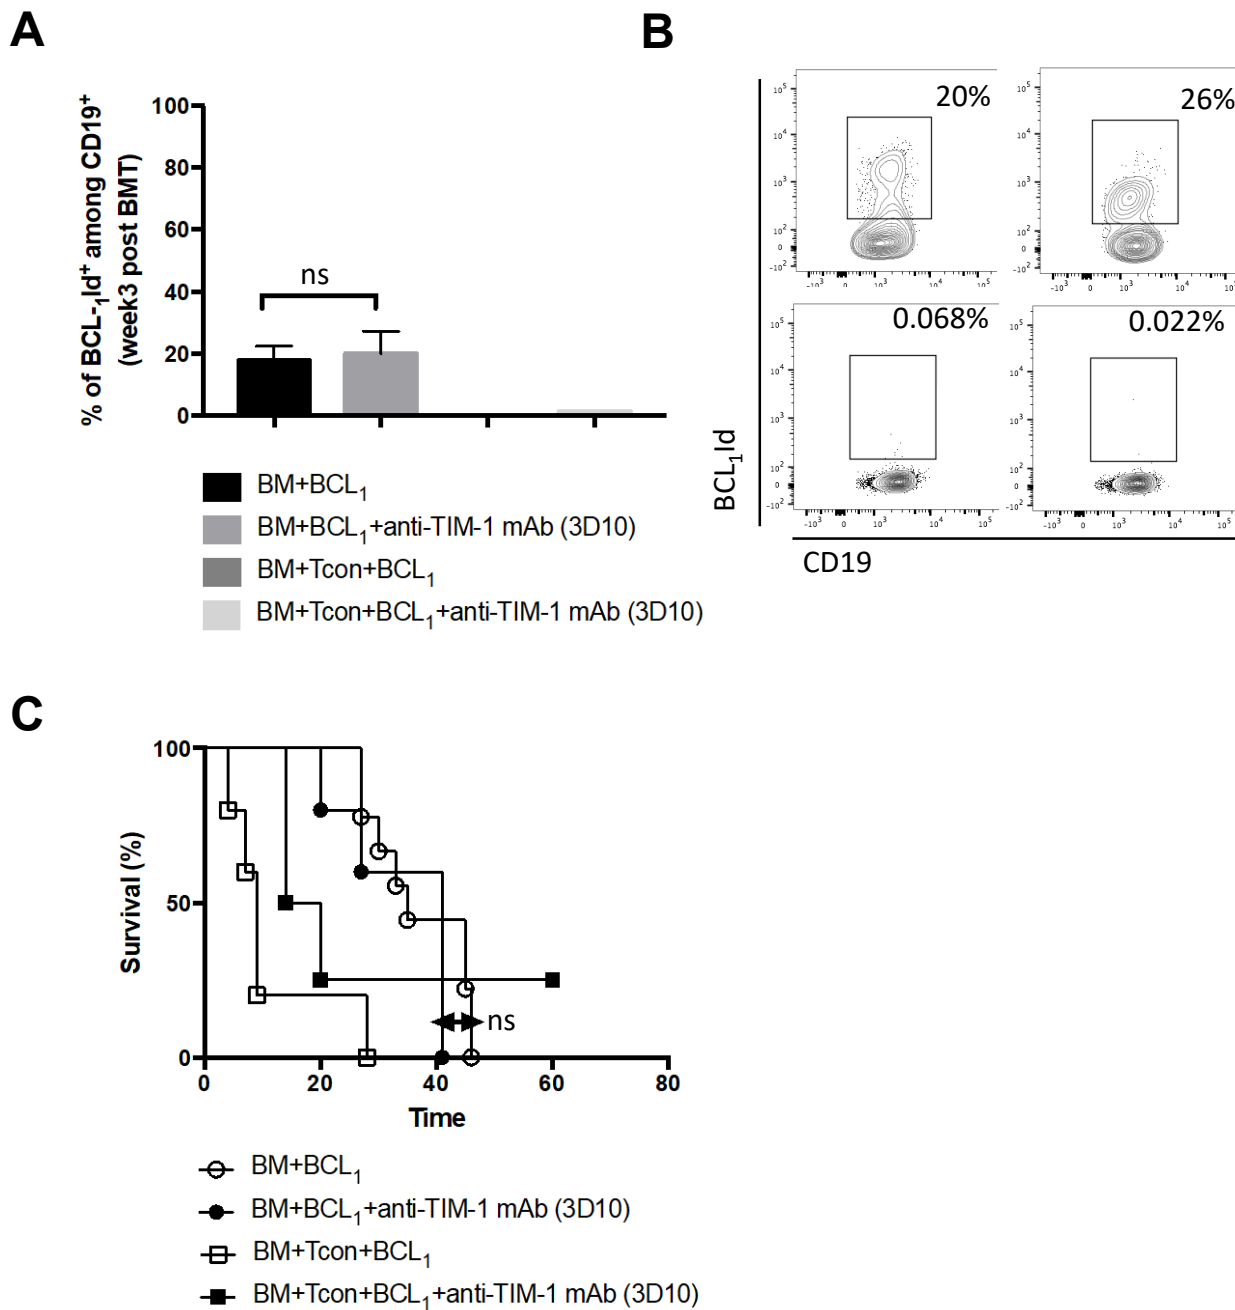

**Figure S5. Antagonistic anti-TIM-1 does not interfere with GVT effect in the BCL<sub>1</sub> tumor model**

**(A)** Tumor burden in mice infused intravenously with 500 BCL<sub>1</sub> leukemia tumor **(B)** Representative flow cytometry plots of BCL<sub>1</sub><sup>+</sup> cells among CD19<sup>+</sup> cells ; top left: BM+ BCL<sub>1</sub>, top right: BM+ BCL<sub>1</sub>+anti-TIM-1 (3D10) bottom left: BM+Tcon+ BCL<sub>1</sub> and bottom right: BM+Tcon+ BCL<sub>1</sub>+anti-TIM-1 (3D10) **(C)** Survival of BALB/c recipient mice when transplanted with B6 TCD and either sham infusion (●), sham infusion and anti-TIM-1 mAb (3D10; 400 μg per mouse given i.p.) (●), Tcons and isotype (□), or Tcons and anti-TIM-1 mAb (3D10; 400 μg per mouse given i.p.) (■). Pooled data of two independent experiments are shown (n=8 mice/group). The log-rank test was used for statistical evaluation of mouse survival (Kaplan-Meier survival curves), with comparison of BM+ BCL<sub>1</sub> to BM+ BCL<sub>1</sub>+ anti-TIM-1 mAb (3D10) shown. Error bars indicate SEM. For statistical analysis the two-tailed Student's t test was used, ns=not significant

## Figure S6

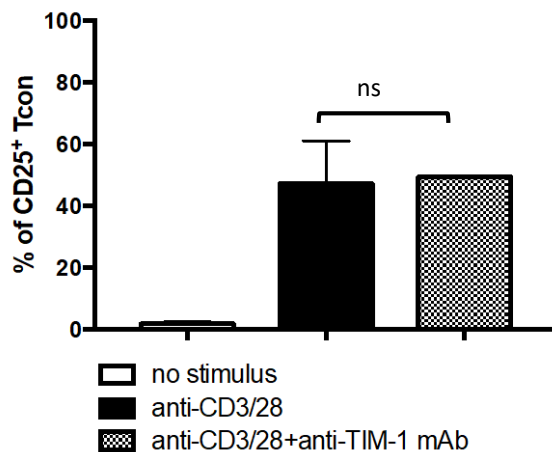

**Figure S6. Treatment with antagonistic anti-TIM-1 mAb does not affect CD25 expression on Tcons *in vitro*.** TIM-1 blockade does not affect CD25 expression of murine T cells stimulated with anti-CD3/anti-CD28 dynabeads at 1:2 ratio, in the presence or absence of anti-TIM-1 mAb (3D10; 20 $\mu$ g/ml). Pooled data of two independent experiments are shown (n=7/group). Error bars indicate SEM. For statistical analysis the two-tailed Student's t test was used, ns=not significant

# Figure S7

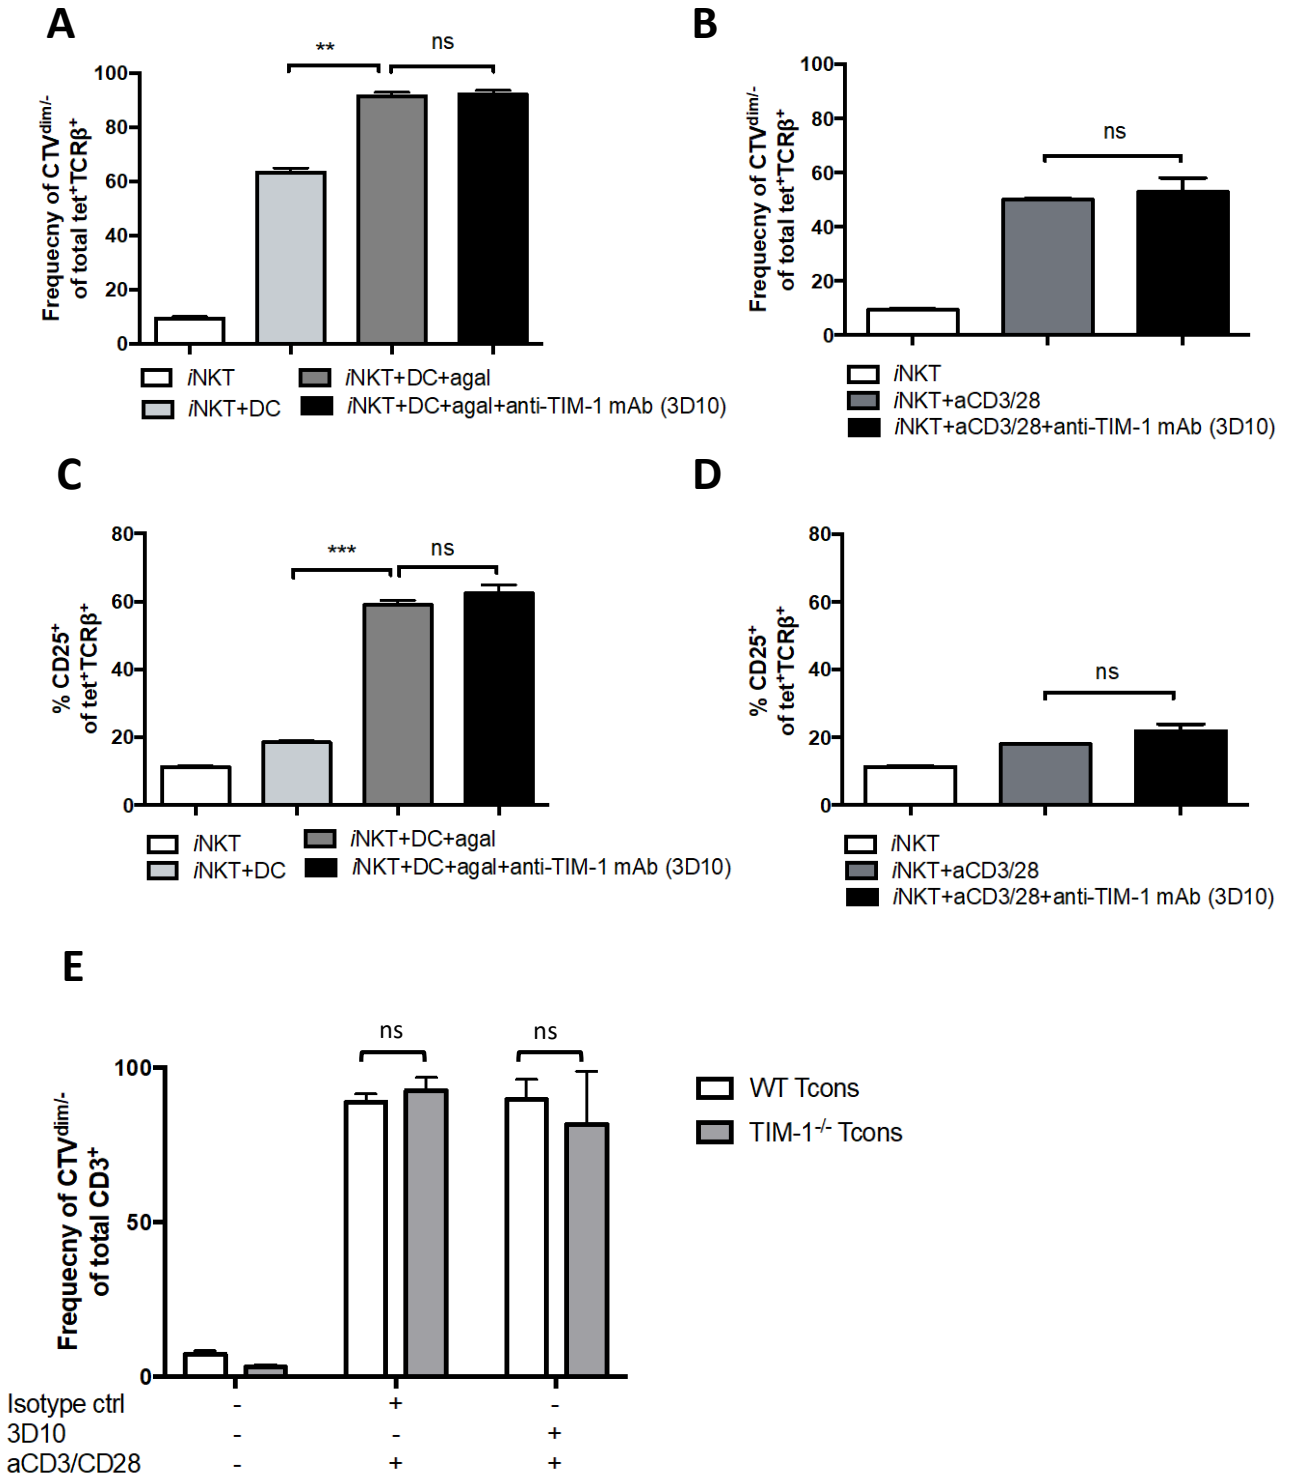



**Figure S7. Treatment with antagonistic anti-TIM-1 mAb does not affect *i*NKT cell proliferation *in vitro*.** (A) TIM-1 blockade (anti-TIM-1 mAb, 3D10; 20 $\mu$ g/ml) does not affect murine *i*NKT cells proliferation upon dendritic cells and  $\alpha$ -galactosylceramide or anti-CD3/anti-CD28 stimulation as shown in (B), neither CD25 upregulation under neither experimental conditions (C) and (D) respectively. (E) WT B6 and TIM-1<sup>-/-</sup> knockout T cells were labeled with CellTrace Violet and stimulated with anti-CD3/anti-CD28 dynabeads at 1:2 ratio. No difference in proliferation was observed between WT and TIM-1<sup>-/-</sup> knockout Tcons. Pooled data of two independent experiments are shown (n=8/group). Error bars indicate SEM. For statistical analysis the two-tailed Student's t test was used. \*\* $p \leq 0.01$ , \*\*\* $p \leq 0.001$ , ns=not significant

Figure S8

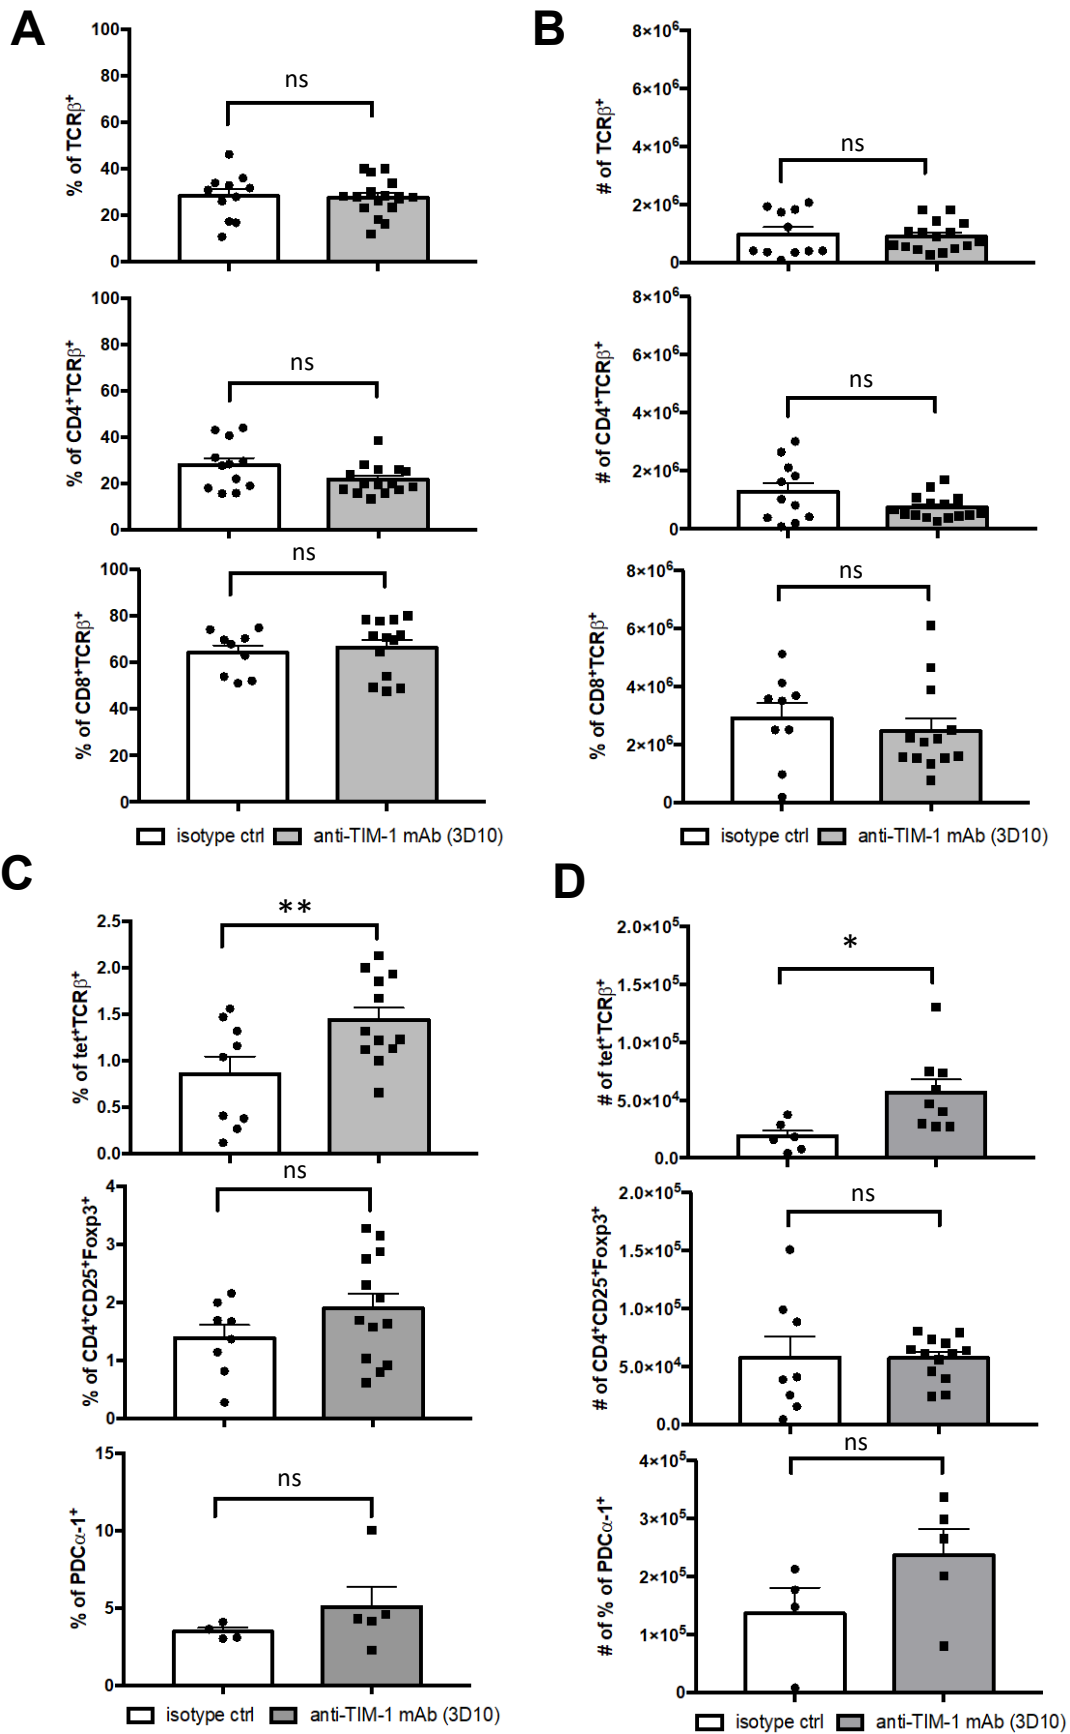

**Figure S8. *i*NKT cells are significantly increased in the spleen of mice treated with the anti-TIM-1 mAb. (A)** Relative percentages and **(B)** absolute numbers of TCR $\beta^+$ , CD4 $^+$ TCR $\beta^+$ , CD8 $^+$ TCR $\beta^+$ , calculated, and **(C)** relative and **(D)** absolute numbers of tet $^+$ TCR $\beta^+$ , CD4 $^+$ CD25 $^+$ Foxp3 $^+$  and PDC $\alpha$ -1 $^+$  at day 9 after transplantation from spleens of BALB/c recipient mice treated with isotype control (white bars) or anti-TIM-1 mAb (3D10) (grey bars). PBS-57-loaded murine CD1d tetramer (tet $^+$ ) was used to identify *i*NKT cells.

# Figure S9

**A**

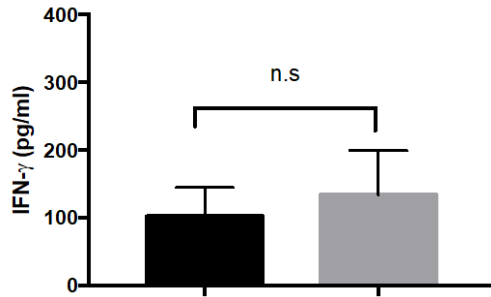

**B**

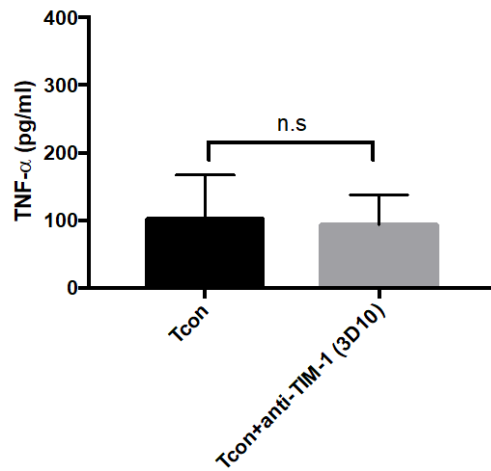

**Figure S9. No differences were detected on serum cytokine levels. (A)** IFN- $\gamma$  and **(B)** TNF- $\alpha$  levels in the serum in mice that received Tcons, Tcons+ anti-TIM-1 mAb (3D10) on day +9 post HCT were analyzed by a multiplex assay (Luminex)

# Figure S10

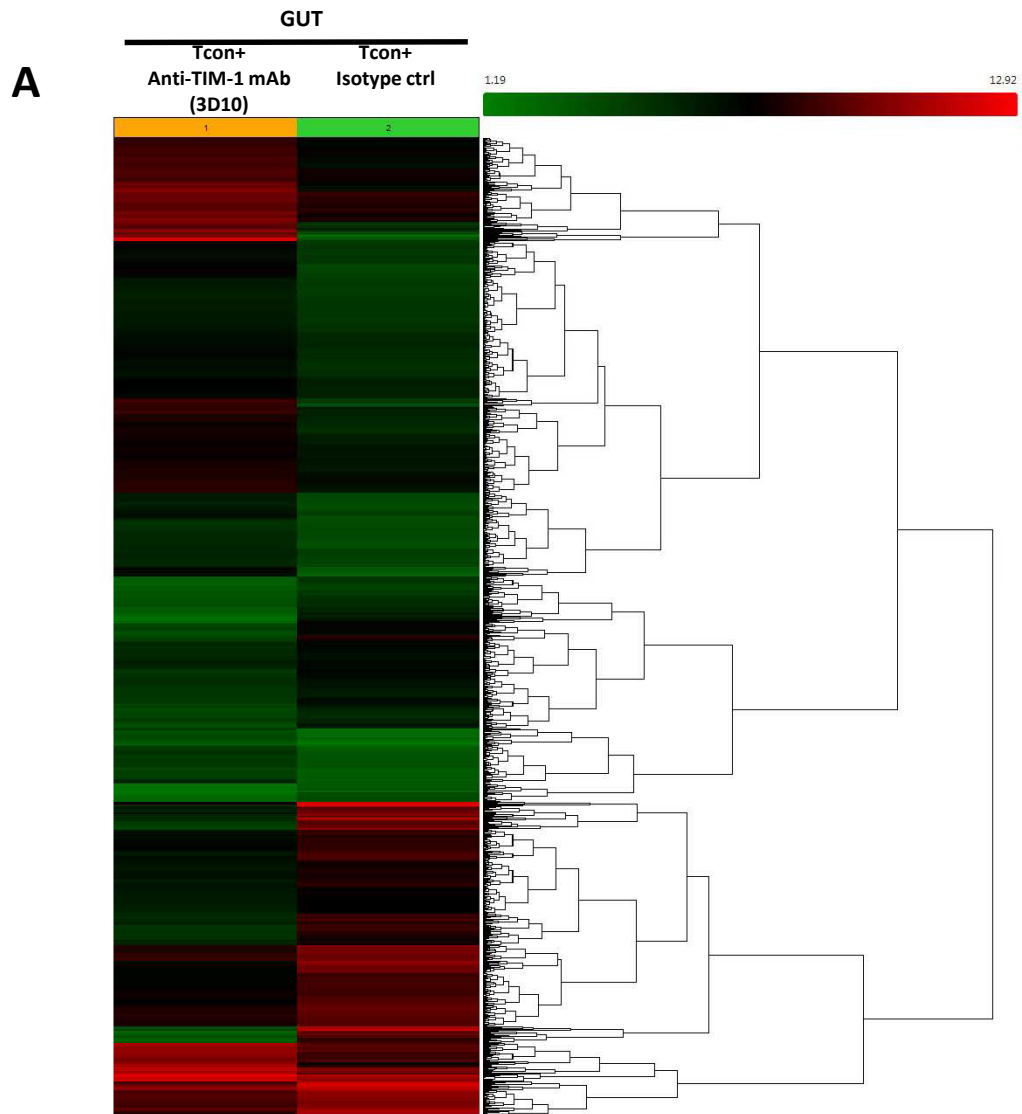

**B**

| Upstream regulator | Tcons+ Anti-TIM-1 mAb | Tcons |
|--------------------|-----------------------|-------|
| IL-10-RA           | +                     | -     |
| IL-4               | +                     | -     |
| IL-13              | +                     | -     |

**Figure S10. Microarray analysis. (A)** Microarray heat map of whole gut cells isolated at day 9 after transplantation from BALB/c recipient mice treated with isotype control or anti-TIM-1 mAb (3D10). Red color indicates upregulated genes and green color indicates downregulated genes. **(B)** Upstream regulators were identified after pathway analysis using IPA (Ingenuity Pathway Analysis) between the anti-TIM-1 mAb (3D10) and isotype control treated groups.
